# Supplementary material
Source: HighWire-hosted journal article supplement (https://endocrinology-journals.org/content/suppl/2016/12/09/JOE-16-0495)

# Supplementary Figure 1

```

Mus_musculus      MAVMKNYLLPILVFLFLAYYYSTNEEFPEMLQGGKVVIVTGASKGIGREMYHLSKMGAH
Rattus_norvegicus ---MKKYLLPVLVLCGLY-YYSTNEEFPEMLQGGKVVIVTGASKGIGREMYHLSKMGAH
Bos_taurus        MAFMKKYLLPILGIFLFLAYYYYSANEFFPEMLRGGKRVIVTGASKGIGREMYHLARMGAH
Canis_lupus_familiaris MAFMKKYLLPILGIFLFLAYYYYSANEFFPEMLQGGKVVIVTGASKGIGREMYHLARMGAH
Homo_sapiens      MAFMKKYLLPILGIFLFLAYYYYSANEFFPEMLQGGKVVIVTGASKGIGREMYHLARMGAH
Macaca_mulatta    MAFMKKYLLPILGIFLFLAYYYYSANEFFPEMLQGGKVVIVTGASKGIGREMYHLARMGAH
Xenopus_(Silurana)_tropicalis -MALLKALVWFTGIFLAVYFYFYSAGDVFPEMLRGGKRVIVTGASSGIGREMYHLARMGSH
Gallus_gallus     MGLFLKVLIPLLGLGLAVYFYFSGGNFSEEMLRGGKRVIVTGASSGIGREMYHLARMGAH
Callorhinchus_milli MGFVKMMLIFLLGIALAYFFNSGDSDFPEMLRGGKRVIVTGASSGIGREMYHLARMGSH
      *   .   :   :   :   :   *   *   *   *   *   *   *   *   *   *

```

```

Mus_musculus      VVLTARSEEGLQKVVSRCLELGAASAHYIAGTMEDMTFAEQFVAKGKIMGGDLMLILNH
Rattus_norvegicus VVLTARSEEGLQKVVSRCLELGAASAHYIAGTMEDMAFAERFVVEGKLLGGDLMLILNH
Bos_taurus        VVVTARSEESLKKVVSRCLELGAASAHYVAGTMENMTFAEQFVAKGKIMGGDLMLILNH
Canis_lupus_familiaris VVVTARSKETLKKVVSRCLELGAASAHYIPGTMEDMTFAEQFVAKGKIMGGDLMLILNH
Homo_sapiens      VVVTARSKETLQKVVSRHCLLELGAASAHYIAGTMEDMTFAEQFVAKGKIMGGDLMLILNH
Macaca_mulatta    VVVTARSKETLQKVVSRHCLLELGAASAHYIAGTMEDMTFAEQFVAKGKIMGGDLMLILNH
Xenopus_(Silurana)_tropicalis ILITARTEELKQKVVQAQCTHLGAASAHYIAGSMOTMTFAKLVVHKGLENLFGGLDMLILNH
Gallus_gallus     VVLTARTEAKLQKVVSKCLDLGAASARVYVSGSMESTAFEEVVKERENINGGLDMLILNH
Callorhinchus_milli ILITARRKQRLNAVVAKCLKLGASADYVAGSMEDMEFAKHVVKEAEKQFGGLDMLILNH
      :   :   *   *   *   *   *   *   *   *   *   *   *   *   *   *

```

```

Mus_musculus      ITQTSLSLFDHDDIHSVRRVMEVNFSLSYVWSTAALPMLKQSNNGSIIVVSSLAGKMTQPMI
Rattus_norvegicus ITQTTMSLFDHDDIHSVRRSMEVNFSLSYVWLSTAALPMLKQSNNGSIIVVSSLAGKMTQPLI
Bos_taurus        IHYTLPGVFSNDIHLRLRTLEVNLLSYVWLSTAALPMLKQTNNGSIIVVSSIAGKINACPLV
Canis_lupus_familiaris ITNTSMNLFSGDIHLVRRSMEVNFSLSYVWLSAALPMLKQSNNGSIIVVSSKAGKMSPLV
Homo_sapiens      ITNTSMLNLFHDDIHHVRRSMEVNFSLSYVWLVAAALPMLKQSNNGSIIVVSSLAGKWAYPMV
Macaca_mulatta    ITNTSMLNLFHDDIHHVRRSMEVNFSLSYVWLVAAALPMLKQSNNGSIIVVSSLAGKWAYPMV
Xenopus_(Silurana)_tropicalis IGHTYFGYFDGNIHVRDLLEINVLSYATMTVAALPMLKQSNNGSIIVVSSVAGELKLSFL
Gallus_gallus     IGRSFFDFGNGVDVHVRKIMETNFLSYVAMTTSALPMLKESEGNIVVSSVSGKVASPFV
Callorhinchus_milli IGSAYFRYFDGVDVHIRTLLLEINFLSYVMTVEAMPMLKQSNNGSIIVVSSIAGKIGNPLV
      *   :   :   *   :   :   *   *   *   *   *   *   *   *   *   *   :

```

```

Mus_musculus      APYSASKFALDGGFFSTIRTELYITKVVNSITLCVLGLIDTETAMKEISGIINA-QASPKE
Rattus_norvegicus ASYSASKFALDGGFFSTIRKEHLMTKVVNSITLCVLGFIDTETALKETSGIILS-QAAPKE
Bos_taurus        AAYSASKFALDGGFFSSLRMEYEATKVVNSITLCILGLIDTETAMKAVAGIFNA-KASPKE
Canis_lupus_familiaris APYSASKFALDGGFFSSVRMEHVSITKVVNSITLCILGLINTDTAMKAVSGIILSTVGAASSE
Homo_sapiens      AAYSASKFALDGGFFSSIRKEYSVSRVNSITLCVLGLIDTETAMKAVSGIVHM-QAAPKE
Macaca_mulatta    AAYSASKFALDGGFFSSIRKEYSVAKVNSITLCVLGLIDTETAMKAVSGIINM-QAAPKE
Xenopus_(Silurana)_tropicalis KFLFLGILLIMY-LFRGLINRF----YD-----VHHPCLTDSALKTVSVIQQ-PAAPKE
Gallus_gallus     APYSATKFALEGGFFSSLRHEFTIEKVVNSITLCILGYINTENAVQVSHIIE-APAPKE
Callorhinchus_milli VPYSSTKFALEDGGFFSSLRQEFAMLNYSITLCVSIYINTEAAVGAISHIQQ-PPAPKD
      :   .   :   :   *   :   .   :   :   *   *   *   :   :   :   :   :

```

```

Mus_musculus      ECALEIIKGTALRKSEVYYDKSPLT-PILLGNPGRKIMEFFSLRYNKMDFVSN-----
Rattus_norvegicus ECALEIIKGTVLRKDEYYDKSSWT-PILLGNPGRRIMEFSLRSYNRDLFVSN-----
Bos_taurus        ECALEIIKGGTLRQDEYYDSSILT-PILLRNPGRKIMEFFFLKRYMERFINN-----
Canis_lupus_familiaris ECALEIIKGGALRQEEVYYDNSVNT-AFLGNPGRKILEFSLRSYKLDKFINN-----
Homo_sapiens      ECALEIIKGGALRQEEVYYDSSLNT-TILLRNPCRKILEFLYSTSYNMDRFINK-----
Macaca_mulatta    ECALEIIKGGALRQEEVYYDSSLNT-TLLMRNPCRKILEFLYLPSYNMDFRTKN-----
Xenopus_(Silurana)_tropicalis ECALEIIKGGALRKRVEYYQYHATKIPLLRLDWAPELLQSLLLKYNMDFQRKEV----
Gallus_gallus     ECALEIIRSGALRQRELHYPASTVPTLLLRDLAPEFLDGLIRNMRVENIKRPPPAQGS
Callorhinchus_milli ECALEIIKGGALRNRVEYYKYEFKVVYLLLRDWPPELLDAFIRKYNLNDIPQNVPHL--
      *   *   *   *   *   *   *   *   *   *   *   *   *   *   *   *

```

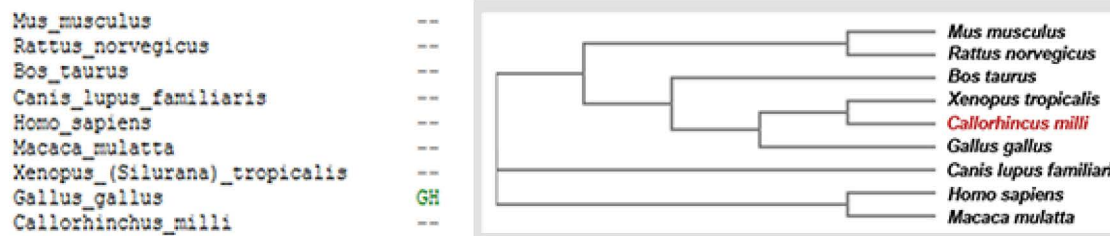

Supplement: supplementary_figure_1.pdf [file supplementary_figure_1.pdf]
