# Supplementary material
Source: HighWire-hosted journal article supplement (https://endocrinology-journals.org/content/suppl/2016/12/09/JOE-16-0495)
Supplement: supplementary_table_1.pdf [file supplementary_table_1.pdf]

**Supplementary Table 1.** Multiple reaction monitoring (MRM) parameters.

| Analyte                      | Method | Precursor ion (m/z) | Quantifier ion (m/z) | Qualifier ion (m/z) | Collision energy (V) | Polarity | Dwell time (ms) |
|------------------------------|--------|---------------------|----------------------|---------------------|----------------------|----------|-----------------|
| 11-Hydroxytestosterone       | A      | 305.21              | 121                  | 97                  | 16; 44               | POS      | 50              |
| 11-Hydroxyandrostendione     | A      | 303.2               | 285.2                | 267.1               | 8; 12                | POS      | 100             |
| 11-Ketotestosterone          | A      | 303.2               | 146.9                | 121                 | 24; 20               | POS      | 100             |
| 11-Ketoandrostendione        | A      | 301.2               | 121.1                | 91                  | 20; 56               | POS      | 100             |
| Testosterone                 | A      | 289.2               | 97.1                 | 109.1               | 24; 28               | POS      | 100             |
| Androstendione               | A      | 287.2               | 97.1                 | 109.1               | 24; 20               | POS      | 100             |
| Cortisol                     | B      | 363.2               | 121                  | 90.9                | 28; 60               | POS      | 50              |
| Cortisone                    | B      | 361.2               | 121                  | 163                 | 36; 24               | POS      | 50              |
| 20 $\beta$ -Hydroxycortisone | B      | 363.22              | 163                  | 105                 | 28; 52               | POS      | 150             |
