# Supplementary material
Source: HighWire-hosted journal article supplement (https://endocrinology-journals.org/content/suppl/2016/12/09/JOE-16-0495)
Supplement: supplementary_table_2.pdf [file supplementary_table_2.pdf]

**Supplementary Table 2.** Optimized ion source conditions and analytical parameters.

| Method | Gas temperature (°C) | Gas flow (l/min) | Nebulizer (psi) | Sheath gas temperature (°C) | Sheath gas flow (l/min) | Capillary voltage (V) | Nozzle voltage (V) | Positive high pressure RF | Positive low pressure RF | Negative high pressure RF | Negative low pressure RF |
|--------|----------------------|------------------|-----------------|-----------------------------|-------------------------|-----------------------|--------------------|---------------------------|--------------------------|---------------------------|--------------------------|
| A      | 290                  | 14               | 20              | 300                         | 11                      | 3000                  | 1500               | 170                       | 90                       | 150                       | 60                       |
| B      | 290                  | 14               | 20              | 350                         | 11                      | 4000                  | 1500               | 200                       | 110                      | 150                       | 60                       |
