# Supplementary material
Source: HighWire-hosted journal article supplement (https://endocrinology-journals.org/content/suppl/2016/12/09/JOE-16-0495)
Supplement: supplementary_table_3.pdf [file supplementary_table_3.pdf]

**Supplementary Table 3.** Primer sequences used for PCR amplification

| <b>Gene</b>        | <b>Sequence</b>                                                                                                       |
|--------------------|-----------------------------------------------------------------------------------------------------------------------|
| <i>Hs HSD11B3</i>  | s: GAGGATCCGCCATGAAGGTGCTTCTCCTCACAG<br>as:GAATCTAGATCACTTGTGCATCGTCGTCCTTGTAGTCCATAGAACCGGCTGCCGCGGCCGT<br>GACGTTGAG |
| <i>Dr hsd11b3a</i> | s: CAGGATCCGCCATGGGGGCTCAAAGGCTTTC<br>as:ACACTCGAGTTACTTGTGCATCGTCGTCCTTGTAGTACATAGAACCAGGATTGTATGTGTA<br>GGAG        |
| <i>Dr hsd11b3b</i> | s: ATAGGATCCGCCATGAAGGTGCTTTTCGGGGTG<br>as:GAATCTAGATTACTTGTGCATCGTCGTCCTTGTAGTCCATAGAACCCGGCCCAGACGACAG<br>TTTGC     |
