# Supplementary material
Source: HighWire-hosted journal article supplement (https://endocrinology-journals.org/content/suppl/2016/12/09/JOE-16-0495)
Supplement: supplementary_table_4.pdf [file supplementary_table_4.pdf]

**Supplementary Table 4.** Primer sequences used for qPCR analysis

| <b>Gene</b>    | <b>Sequence</b>                                        |
|----------------|--------------------------------------------------------|
| <i>gilz</i>    | s: CGACTTGTTTATATGGGCTG<br>as: TCTTCAGACACCAACATGCC    |
| <i>fkbp5</i>   | s: CACGTTCACAAACACACTGC<br>as: ATCAAACGAACAAGCGGGTC    |
| <i>hsd11b2</i> | s: TCCACTATCTTACCCTCAGCC<br>as: GCTCTTGTACTGTTTCTCCCAG |
| <i>rpl13a</i>  | s: TCGTCTTTCCGCTATTGTGG<br>as: GGTTGGTGTTTCATTCTCTTGC  |
